## RESEARCH ARTICLE

Tracking the emergence of a novel genotype of *Decapod hepanhamaparvovirus* in shrimp using laser microdissection and next generation sequencingRoberto Cruz-Flores<sup>1,2</sup>, Arun K. Dhar<sup>1\*</sup>

**1** Aquaculture Pathology Laboratory, School of Animal and Comparative Biomedical Sciences, The University of Arizona, Tucson, Arizona, United States of America, **2** Centro de Investigación Científica y de Educación Superior de Ensenada (CICESE), Ensenada, Baja California, México

\* [adhar@arizona.edu](mailto:adhar@arizona.edu)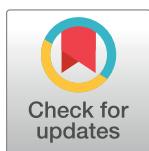

## OPEN ACCESS

**Citation:** Cruz-Flores R, Dhar AK (2024) Tracking the emergence of a novel genotype of *Decapod hepanhamaparvovirus* in shrimp using laser microdissection and next generation sequencing. PLoS ONE 19(10): e0311592. <https://doi.org/10.1371/journal.pone.0311592>

**Editor:** Murtada D. Naser, University of Basrah, IRAQ

**Received:** July 10, 2024

**Accepted:** September 20, 2024

**Published:** October 10, 2024

**Copyright:** © 2024 Cruz-Flores, Dhar. This is an open access article distributed under the terms of the [Creative Commons Attribution License](https://creativecommons.org/licenses/by/4.0/), which permits unrestricted use, distribution, and reproduction in any medium, provided the original author and source are credited.

**Data Availability Statement:** The raw nucleotide sequence data reported in this manuscript are available in the NCBI Sequence Read Archive (SRA) databases under the BioProject ID: PRJNA1130503, SubmissionID (SUB14569879) (<https://www.ncbi.nlm.nih.gov/sra/PRJNA1130503> (accessed on 02 July 2024)). The viral genomes derived from this data can be found under GenBank accession number: PP417729, PP417730, PP417731 and PP417731.

## Abstract

The prevalence of hepatopancreatic diseases in cultured shrimp has increased in recent years. *Decapod Hepanhamaparvovirus* 1 (DHPV) infection was identified by histology in samples that could not be detected by PCR-based assay for this virus. Employing Laser Microdissection (LMD), we dissected cells containing intranuclear inclusion bodies pathognomonic for DHPV infection from histological sections. Whole Genome Amplification and NGS were used to generate five complete genomes of the novel DHPV isolate that showed identities ranging from 77% to 98% to previously reported isolates. Phylogenetic analyses revealed the DHPV isolate represents a novel genotype, Genotype V. We developed PCR and *in situ* hybridization methods tailored for the specific detection of this genotype. Our approach of combining LMD with NGS opens avenues for rapid identification of emerging viral pathogens and retrospective studies to understand origin and evolution of viruses showcasing the transformative potential of the innovative approach used in this study.

## Introduction

Accurate and sensitive pathogen detection is only achievable through the combination of complementary diagnostic techniques. This becomes relevant when dealing with viral pathogens that have very high mutations rates such as viruses with ssRNA and ssDNA genomes [1, 2]. *Decapod penstylhamaparvovirus* 1 commonly known as Infectious Hypodermal and Hematopoietic Necrosis Virus (IHHNV) is a shrimp parvovirus (family *Parvoviridae*) that has been found to poses a very high mutation rate comparable to those of ssRNA [2, 3]. A close relative of IHHNV within the sub-family *Hamaparvovirinae* is *Decapod hepanhamaparvovirus* 1 (DHPV) commonly known as Hepatopancreatic parvovirus (HPV) [4]. The genetic variation of DHPV strains is considerable and a genetic drift of 8–15% has been reported by [5]. It is plausible to consider that the substantial genetic diversity observed among DHPV strains may be attributed to an exceptionally elevated mutation rate, akin to that of IHHNV.

**Funding:** Funding for this research was provided by the College of Agriculture & Life Sciences, University of Arizona to Arun K. Dhar (#1370570). Partial funding was also provided by the Aquaculture Pathology Laboratory, University of Arizona to Arun K. Dhar (#2484210). The funders had no role in study design, data collection and analysis, decision to publish, or preparation of the manuscript.

**Competing interests:** The authors declare that they have no known competing financial interests or personal relationships that could appear to influence the work reported in this study.

Single-stranded DNA viruses do not possess proof-reading activity as the DNA replicase does not have a complement strand to compare against [5]. This of course leads to higher mutation rates and, most importantly, from a disease diagnostic perspective it directly impacts the accuracy of PCR and qPCR based diagnostic assays. In recent years, DHPV diagnostics by PCR/qPCR methodologies has been particularly challenging. The emergence of several novel DHPV (GenBank: ON872187.1) strains from Korea has exemplified this challenge as PCR-based methodologies recommended by the World Organization for Animal Health (WOAH, Paris, France) failed to detect this particular viral strain [6]. Several research groups have encountered this problem and sensitive universal semi-nest PCR methodologies have been developed for the detection of several DHPV strains [7].

While a substantial genomic variation exists within the *Hepanhamaparvovirus* genus, one enduring aspect that unifies this pathogenic group is the consistent pathological manifestation of the virus at a histological level. This positions histological examination, for the current time, as the gold standard for diagnosis for DHPV. The hepatopancreas is the principal target tissue of this virus. DHPV's infection progression entails the infiltration of tubule epithelial cells, culminating in the development of prominent intranuclear basophilic inclusion bodies within the E- and F-cells, predominantly concentrated along the distal section of the hepatopancreatic tubules [8].

In 2021, Aquaculture Pathology Laboratory in the University of Arizona, a Reference Laboratory of the WOAH for Crustacean Diseases (<https://www.woah.org/en/what-we-offer/expertise-network/reference-laboratories/#ui-id-3>) received diagnostic cases from a country in Latin America that presented the distinctive inclusion bodies that are pathognomonic of DHPV infection. However, PCR-based diagnostics failed to detect the virus in these samples. In this study, we employed a Laser Microdissection (LMD) to selectively microdissect infected cells containing inclusion bodies, reducing the presence of apparently healthy cells to ultimately minimize the host-related nucleic acids in the genomic DNA to facilitate subsequent bioinformatics analysis. Given the scant amount of nucleic acids within the microdissected cells, we conducted Whole Genome Amplification (WGA) to obtain a sufficient DNA quantity for subsequent Next Generation Sequencing (NGS). We report here a methodology for sequencing the complete genome of a viral agent from a limited number of cells derived from formalin-fixed paraffin-embedded (FFPE) tissue, including the complete genome of a novel genotype of DHPV (Fig 1).

## Material and methods

### Sample origin and diagnostic evaluation

Davidson fixed shrimp (*Penaeus vannamei*) samples were received from a country in Latin America in 2021. Fixed samples were processed in a tissue processor, embedding in paraffin and sectioned (5 µm thick) using a standard methodology [9]. Tissue sections were stained with H&E following standard procedures. Histological slides were examined using a bright field light microscope.

Total genomic DNA was isolated from paraffin embedded tissue sections using a Arcturus® Pico Pure® DNA extraction kit and DHPV detection carried out following two published protocols [7, 10].

### Laser Capture Microdissection, DNA extraction and Whole Genome Amplification

Five FFPE tissue blocks of shrimp (case 21–269) that displayed the typical intranuclear inclusion bodies formed by DHPV were selected for LMD. Deparaffinized 5 µm sections

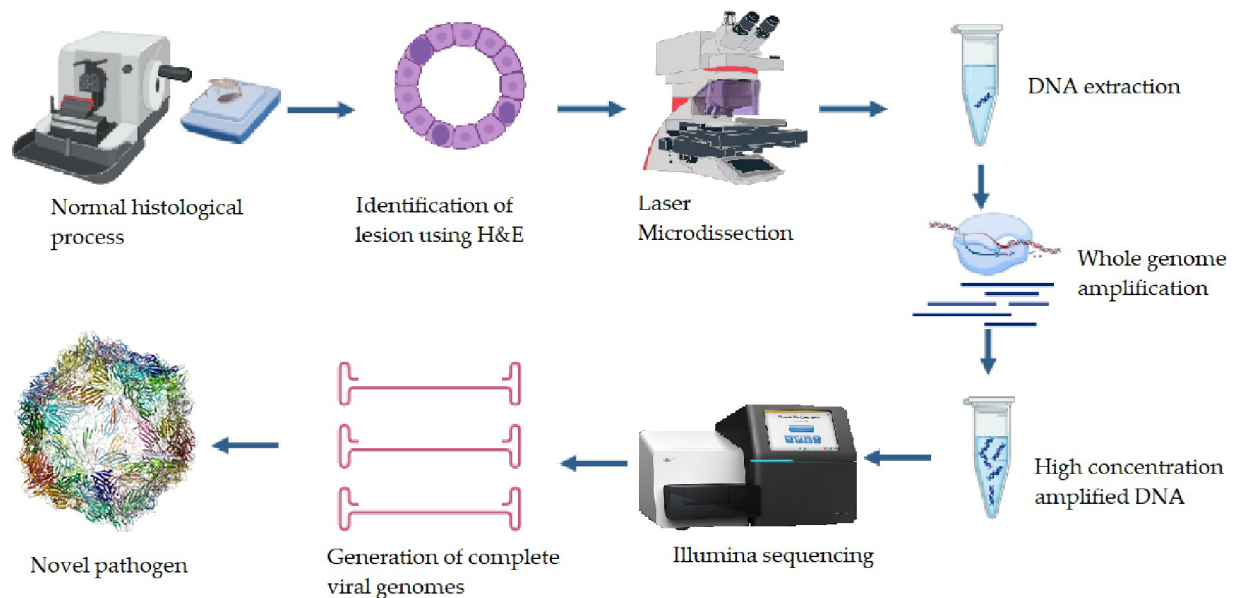

**Fig 1. Pathogen discovery pipeline using molecular histology.** Our innovative pathogen discovery pipeline leverages the power of molecular histology, starting with the histological processing of the tissue of interest. Lesions or alterations are identified with precision and selected using a Laser Microdissection Microscope. From these, individual cells or a small cluster of cells are isolated for nucleic acid extraction. Given the minute quantity of nucleic acids, we employ whole genome amplification to increase their concentration. The amplified DNA is then sequenced using an Illumina sequencer. Bioinformatic analyses are conducted to assemble the viral genome, leading to the discovery of novel pathogens or new strains of existing ones.

<https://doi.org/10.1371/journal.pone.0311592.g001>

were mounted on PEN membrane glass slides (Life Technologies) and stained with Arcturus® Paradise® PLUS Reagent System [11]. The slides were labeled as 21-269-1, 21-269-3/1, 21-269-3/2, 21-269-4/1, and 21-269-4/2. DHPV inclusion bodies were dissected using an LMD7-Laser Microdissection Microscope (Leica Microsystems™). DNA was extracted using Arcturus® Pico Pure® DNA extraction kit. Considering the extremely low quantity of DNA derived from few cells, the DNA was amplified using a whole genome amplification method and the SeqPlex DNA Amplification Kit (Sigma-Aldrich) following the manufacturers recommendations. The WGA DNA was sent to OmegaBioservices, Norcross, GA. Library for the DNA samples were generated at OmegaBioservices using the Library Kit, KAPA Hyper prep for WGS (Roche). The samples were sequenced using an Illumina HiSeq 2500 System (PE 2X150PE).

### Bioinformatics analysis

The DNA reads were paired and duplicate reads were removed using the Dedupe plugin in Geneious Prime version 2023 [12]. DNA reads from the DHPV infected shrimp were checked for quality and trimmed using the BBDuk plugin and were *De Novo* assembled using the Geneious assembler with the default parameters with one modification. The program was set to circularized contigs if ends matched. The mean coverage of each based was calculated. The contigs generated from the *De Novo* assembly were annotated using BLASTn and Geneious Prime [12, 13]. The complete genomes, NS1, NS2 and the VP genes were compared with BLASTn and BLASTp [13]. The complete DHPV genomes reconstructed from LMD derived DNA (GenBank accessions: PP417729, PP417730, PP417731 and PP417731) were submitted to GenBank.

Table 1. Primers designed for the specific detection of a novel genotype of *Decapod hepanhamaparvovirus 1* by conventional PCR from FFPE derived DNA.

| Primer name | Location on the PP417729 genome | Primer sequence (5' to 3') | Product size |
|-------------|---------------------------------|----------------------------|--------------|
| VP 1F       | 4,554–4,573                     | ACGACAGGTTGACATGGACC       | 147 bp       |
| VP 1R       | 4,700–4,681                     | CCAACTCGAGGTTCCCCATC       |              |
| VP 2F       | 3,851–3,870                     | CAGTTGGGACGTGACAGTGA       | 122 bp       |
| VP 2R       | 3,972–3,953                     | ATGGCTGTTGTTGCTGTCCT       |              |

<https://doi.org/10.1371/journal.pone.0311592.t001>

## Identity confirmation by PCR and in situ hybridization

Two primers located in the capsid region were designed utilizing Geneious Prime (S1 Fig). The primer sequence and location are shown in Table 1. Furthermore, both the WOA reference primers and the newly designed primers were aligned with the reference sequence of DHPV (NC\_014357) and the novel DHPV genotype (PP417729) to identify and visualize any mismatches within the primer regions, thereby ensuring the specificity of the primers (S1 Fig). DNA from the five blocks was isolated using a commercially available FFPE DNA Purification Kit (NORGEN BIOTEK CORP). The extraction protocol closely followed the manufacturer's recommendations, with minor modifications. During the deparaffinization step, the number of xylene washes were doubled, and the resulting pellet was air-dried for 20 minutes. Moreover, in the lysate preparation stage, the incubation at 90°C was extended from 1 hour to 1 hour and 15 minutes. Each sample yielded two elution.

Each PCR amplification was conducted in a total volume of 25 µl containing 1 µl of template DNA (50–100 ng/ µl), 12.5 µl of DreamTaq Hot Start Green PCR Master Mix (Thermo-Fisher) and 350 nM of each primer pair targeting the viral capsid gene, VP (VP 1F/1R and VP 2F/2R). The PCR conditions consisted of an initial denaturation at 95°C for 2 min, followed by 45 cycles at 95°C for 10 s, 60°C for 10 s and 72°C for 10 s with a final elongation step at 72°C for 2 min. The PCR products were run on a 2% agarose gel and were visualized on a Gel-Doc XR + (Bio-Rad). The amplicons were sequenced at the University of Arizona Genetics Core.

For *in situ* hybridization, all sections were dried onto positively charged microscopic slides and *in situ* hybridization was carried out following the protocols described by [14, 15] with an equivolume mixture of four primers VP 1F, VP 1R, VP 2F and VP 2R. These primers were tailed at 3'-end with digoxigenin-11-dUTP (Integrated DNA Technologies®, San Diego, CA). After deparaffinization, hydration, proteinase K digestion, and pre-hybridization, the sections were overlaid with 500 µL of hybridization solution containing DIG-labeled primers (100 fmol). The slides were placed on a heated surface at 90°C for 10 min and hybridized overnight at 50°C. Final detection was performed with an anti-digoxigenin antibody conjugated to alkaline phosphatase (Roche), which was visualized using nitro blue tetrazolium and 5-bromo-4-chloro-3-indolyl phosphate [16].

## Phylogenetic analysis

To investigate the evolutionary relationship within the DHPV genomes and other *Hepanhamaparvovirus*, we conducted a series of phylogenetic analyses. The GenBank accession numbers of the utilized genomes are: JN082231, GU371276, EU346369, ON872187, AY008257, DQ002873, EU588991, FJ410797, EU2475528, PP417729, PP417730, PP417731, PP417731, and AF273215 (*Decapod penstylhamaparvovirus 1* outgroup). For the phylogenetic analysis, two trees were constructed, one tree utilized the full genome nucleotide sequence, and the second tree utilized the complete coding region of the capsid protein gene. To obtain the capsid gene sequence, the corresponding annotation was extracted in Geneious prime and translated.



The process of constructing the phylogenetic trees began with the alignment of the sequences using the MUSCLE algorithm in Geneious Prime [12, 17]. The evolutionary lineage was deduced by applying the Neighbor-Joining method, while employing the p-distance model [18, 19]. The percentage of replicate trees in which the associated taxa clustered together in the bootstrap test (1000 replicates) are shown next to the branches [20]. The tree is drawn to scale, with branch lengths in the same units as those of the evolutionary distances used to infer the phylogenetic tree [21].

## Results

### Detection of DHPV using the WOAHP recommended PCR and histological examination

Using H&E histology, the diagnostic cases displayed the presence of prominent intranuclear basophilic inclusion bodies within the E- and F-cells. The inclusion bodies were concentrated along the distal end of the hepatopancreatic tubules (Fig 2). However, following a published protocol for DHPV detection [10], the virus could not be detected in these samples. The sequence alignment of the WOAHP reference primers revealed multiple mismatches in the reverse primer binding region (S1 Fig), suggesting that these primers may not be compatible. In addition, the semi-nested PCR methodology recently described by [7] also yielded negative results.

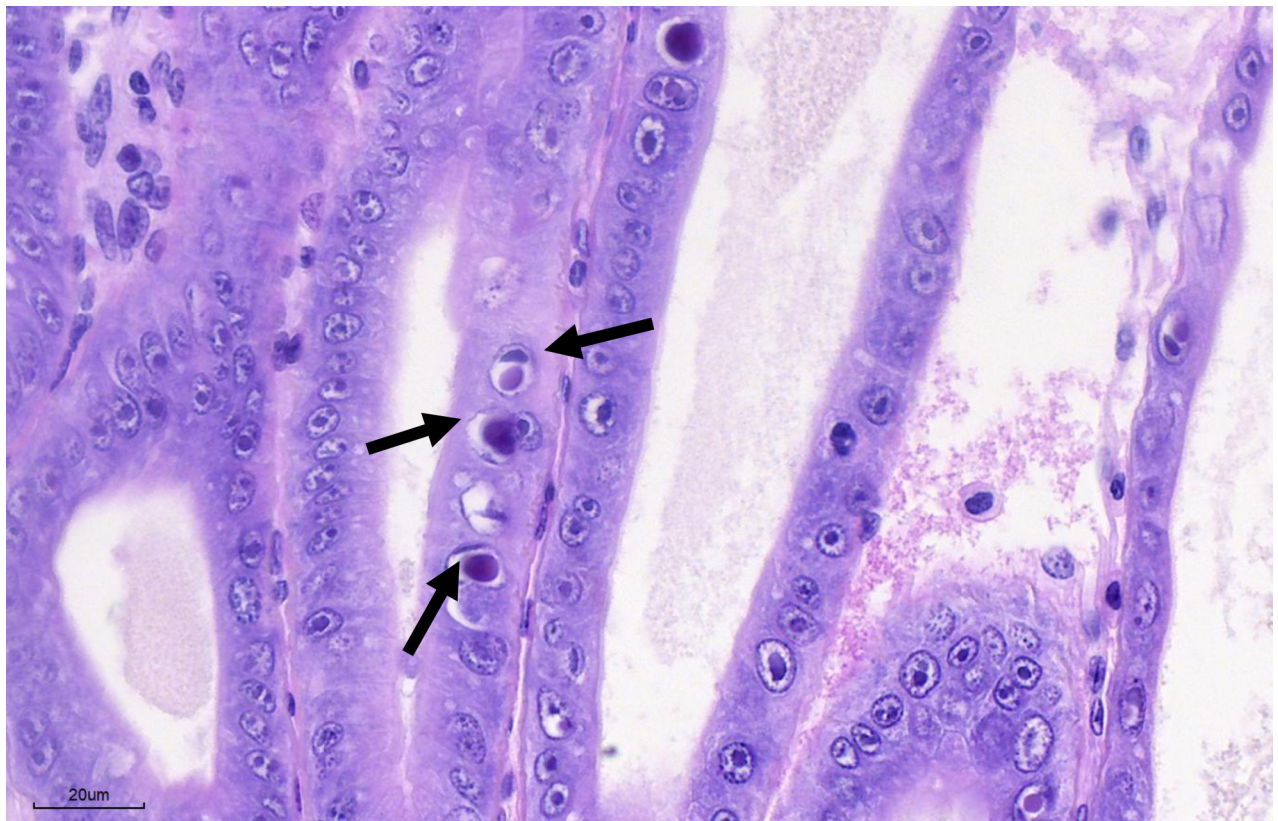

**Fig 2.** Distal tubules of the hepatopancreas of *Penaeus vannamei* from case 21–269 showing the typical basophilic intranuclear inclusion bodies (black arrows) caused by DHPV.

<https://doi.org/10.1371/journal.pone.0311592.g002>

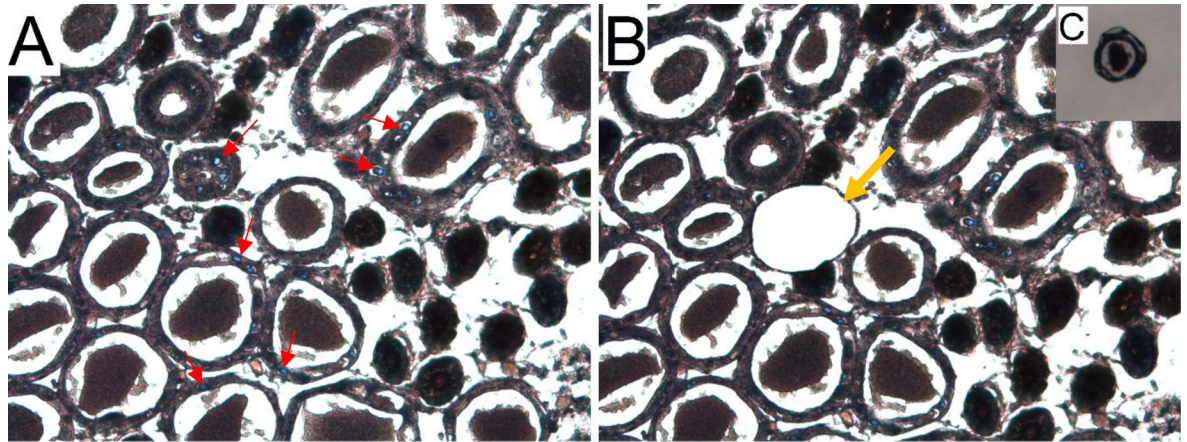

**Fig 3. Decapod hepanhamaparvovirus intranuclear inclusion bodies stained with Arcturus® Paradise® PLUS Reagent.** The slides are not mounted (no cover slip). (A) A tissue section prior to microdissection. The intranuclear inclusion bodies formed by DHPV stained bright blue to azure. Some inclusions are shown by the red arrows. (B) Same tissue section that displays tubule epithelial cells with heavily infected cells were dissected (orange arrow). (C) A dissected tubule in the cap of a 0.6 ml tube ready for DNA extraction.

<https://doi.org/10.1371/journal.pone.0311592.g003>

### Laser Microdissection of the intranuclear inclusion bodies formed by DHPV

The intranuclear inclusion bodies formed by DHPV stained bright blue to azure with the Arcturus® Paradise® PLUS stain and were easily differentiated from the grayish to brown host tissue (Fig 3A). Utilizing a Laser Microdissection Microscope hepatopancreatic tubule cells heavily infected with candidate DHPV were Microdissected and taken for isolation of total genomic DNA (Fig 3B and 3C).

### Analysis of the novel DHPV isolate

Next Generation Illumina sequencing of the five samples derived from LDM DNA yielded 13,477,364, 7,672,328, 7,422,530, 5, 356,582 and 7,199,404 cleaned PE reads for samples 21-269-1 (GenBank accession: PP417729), 21-269-3/1 (GenBank accession: PP417732), 21-269-3/2, 21-269-4/1 (GenBank accession: PP417731) and 21-2694/2 (GenBank accession: PP417730), respectively. The complete genome length for each sample is 6,195 nt, 6,196 nt, 6,195, 6,195nt and 6,197 nt for samples 21-269-1, 21-269-3/1, 21-269-3/2, 21-269-4/1, and 21-2694/2, respectively. The viral sequences identified within the assembled contigs comprised 17.96%, 5.21%, 17.51%, 18.19%, and 19.11% of the total reads obtained from samples 21-269-1, 21-269-3/1, 21-269-3/2, 21-269-4/1, and 21-269-4/2, respectively. The five generated genomes were almost identical with an identity that ranged from 99.96–100% (Table 2).

**Table 2. Nucleotide identity (%) between the five genomes generated from samples 21-269-1, 21-269-3/1, 21-269-3/2, 21-269-4/1, and 21-2694/2.** A high sequence identity (99.96–100%) was observed between the five samples.

|            | 21-269-1 | 21-269-3/1 | 21-269-3/2 | 21-269-4/1 | 21-2694/2 |
|------------|----------|------------|------------|------------|-----------|
| 21-269-1   |          | 100        | 100        | 99.98      | 99.98     |
| 21-269-3/1 | 100      |            | 100        | 99.98      | 99.96     |
| 21-269-3/2 | 100      | 100        |            | 99.98      | 99.98     |
| 21-269-4/1 | 99.98    | 99.98      | 99.98      |            | 100       |
| 21-2694/2  | 99.98    | 99.96      | 99.98      | 100        |           |

<https://doi.org/10.1371/journal.pone.0311592.t002>

**Table 3. Nucleotide and amino acid sequence identity of the complete genome, NS1, NS2 and VP genes of the novel genotype of *Decapod hepanhamaparovirus* from Latin America.**

| Virus                                                              | Accession   | Query Cover (%) | E-value | Percent Identity (%) |
|--------------------------------------------------------------------|-------------|-----------------|---------|----------------------|
| <b>Whole Genome</b>                                                |             |                 |         |                      |
| Korean decapod hepadensovirus isolate Pv/2021/21-0044B             | ON872187.1  | 99              | 0.0     | 98.53                |
| Hepadensovirus sp strain GJ2022                                    | OQ857568.1  | 95              | 0.0     | 88.22                |
| <i>Penaeus chinensis</i> hepadensovirus                            | AY008257.2  | 92              | 0.0     | 77.35                |
| <b>NS1</b>                                                         |             |                 |         |                      |
| Nonstructural protein 1 (Korean decapod hepadensovirus)            | WOJ46325.1  | 100             | 0.0     | 97.57                |
| Nonstructural protein 1 (Hepadensovirus sp)                        | WLG15885.1  | 100             | 0.0     | 97.40                |
| Nonstructural protein 1 ( <i>Penaeus chinensis</i> hepadensovirus) | ABY60414.1  | 99              | 0.0     | 87.65                |
| <b>NS2</b>                                                         |             |                 |         |                      |
| Nonstructural protein 2 (Hepadensovirus sp)                        | WLG1588.7.1 | 100             | 0.0     | 99.29                |
| Nonstructural protein 2 (Hepadensovirus sp)                        | WLG15888.1  | 100             | 0.0     | 85.31                |
| Nonstructural protein 2 ( <i>Penaeus monodon</i> hepadensovirus)   | YP271914.1  | 100             | 0.0     | 67.60                |
| <b>VP</b>                                                          |             |                 |         |                      |
| Structural protein (Hepadensovirus sp)                             | UXK32600.1  | 99              | 0.0     | 96.82                |
| Capsid protein (Korean decapod hepadensovirus)                     | WOJ46326.1  | 99              | 0.0     | 96.40                |
| Structural protein (Hepadensovirus 4)                              | YP_00230847 | 97              | 0.0     | 62.27                |

<https://doi.org/10.1371/journal.pone.0311592.t003>

Sequence analysis of the complete genome of the novel DHPV isolate using sequence 21-2694/2 showed a 98.53% identity at a whole genome level with the recent Korean decapod hepadensovirus isolate Pv/2021/21-044B (Accession: ON872187.1). Furthermore, amino acid (aa) sequence analysis of the NS1, NS2 and VP genes showed a 97.57%, 99.29% and 96.82% identity to Korean decapod hepadensovirus NS1 gene (Accession: WJ46325.1), Hepadensovirus sp. NS2 gene (Accession: WLG15887.1) and Hepadensovirus sp. structural protein (Accession: UXK32600.1) respectively, as seen in Table 3.

### Confirmation of DHPV presence by PCR and in situ hybridization

Two primer pairs were designed based on the capsid protein gene of the novel DHPV. These primers amplified a 147 bp amplicon with the five samples tested and did not react with the DHPV DNA that is routinely used as a positive control in PCR amplification following the WOA protocol (Fig 4). Furthermore, when these primers were labelled with DIG and used for *in situ* hybridization, a strong reaction was observed in the inclusion bodies formed by DHPV in all five samples (21-269-1, 21-269-3/1, 21-269-3/2, 21-269-4/1, and 21-2694/2) (Fig 4).

### Phylogenetic analysis

There are four widely recognized genotypes of *Decapod hepanhamaparovirus* 1. The novel genotype from this study did not cluster with any of the known genotype and it formed a highly supported cluster with the recently described DHPV isolate from Korea (ON872187.1) in both phylogenies that are based on the complete genome sequence and amino acid sequence of the capsid protein (Fig 5).

### Discussion

Laser microdissection and Laser Capture Microdissection were developed within the realm of solid tissue analysis in addressing the inherent complexity and heterogeneity of these structures composed of various morphologically and functionally distinct cell types. Consequently,



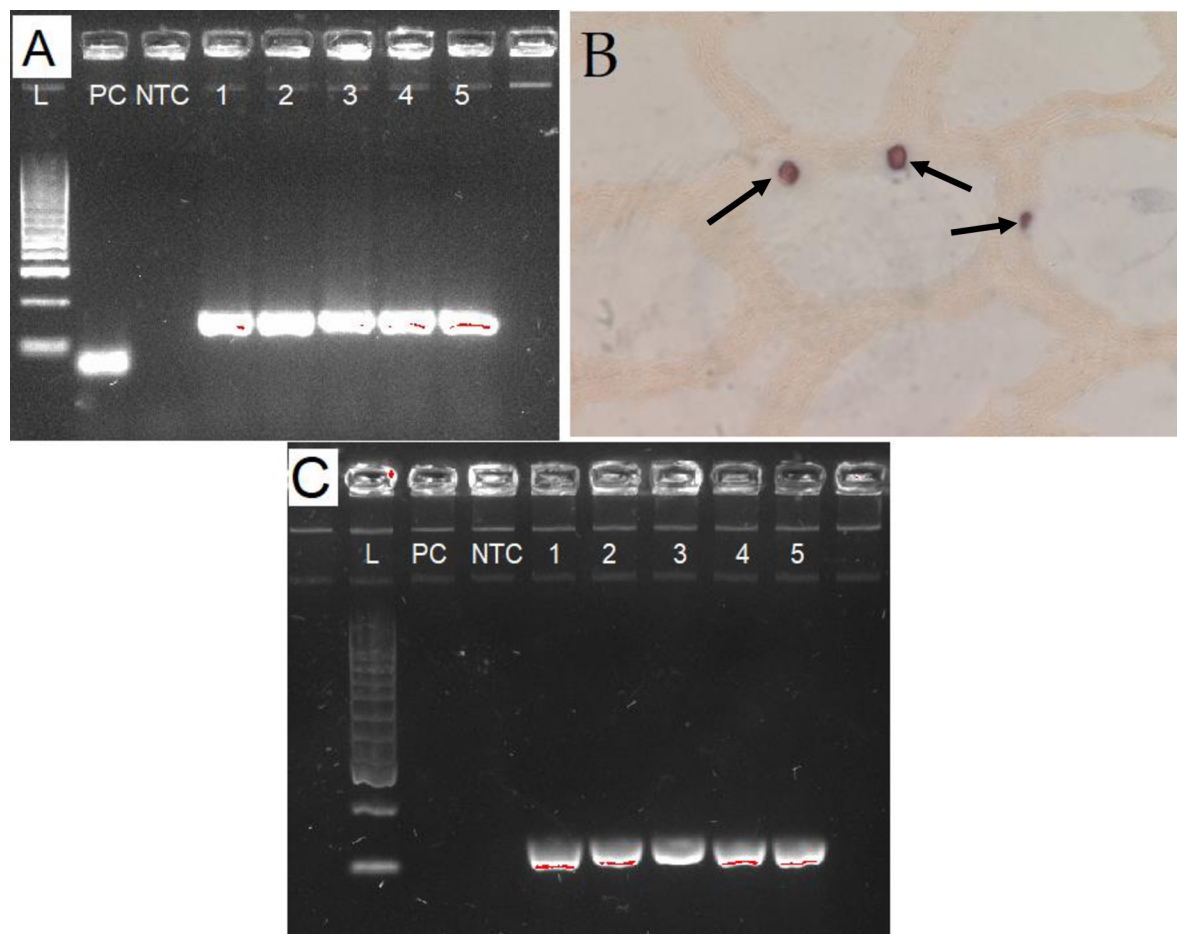

**Fig 4. Confirmation of presence of the novel genotype of *Decapod hepanhamaparvovirus* from Latin America by PCR and ISH.** (A and C) Gel electrophoresis of PCR products generated using primers VP 1F/1R and VP 2F/2R from samples 1 (269–1), 2 (21–269–3/1), 3 (21–269–3/2), 4 (21–269–4/1) and 5 (21–2694/2). The positive control (PC) was represented by plasmid DNA isolated from a DHPV clone routinely used for the detection of the virus following the WOH recommended protocol. NCT = No template control. PCR products of the expected size of ~147 bp and ~122 bp for panel A and C respectively are observed in all five samples while the PC did not provide any amplicon. (B) Detection of a novel DHPV isolate from Latin America using an *in situ* hybridization using DIG-labelled probe. A dark brown precipitate indicating the presence of DHPV inclusion bodies is shown by red arrows.

<https://doi.org/10.1371/journal.pone.0311592.g004>

when conducting whole-tissue analysis, the resulting outcomes are often dictated by the prevalent cell type, potentially obscuring biologically significant changes present in specific cell subsets or a minority of cells. The advent of advanced yet user-friendly laser-based methodologies has facilitated studies that seamlessly integrate microscope-based morphological analysis with a wide array of potent molecular technologies [22, 23]. LMD has advanced the study of host-microorganism interactions and several studies have characterized the host response to commensal or pathogenic bacterial infections in the intestine [24], stomach [25], lung [26] and bladder [27] at a gene expression level [28] in terrestrial animals and human. In addition, LMD has been recently applied to analyze the spatial architecture of the bacterial microbiota of mucosal tissues [29–31]. While the use of LMD/LCM coupled with whole genome amplification (WGA) techniques has been postulated as a powerful tool to study low intensity and/or intracellular pathogens [32, 33], to date no studies have been successful at sequencing the complete genome of a viral pathogen derived from LMD cells. To our knowledge, this is the first study that has successfully sequenced the complete genome of a virus from LMD derived DNA



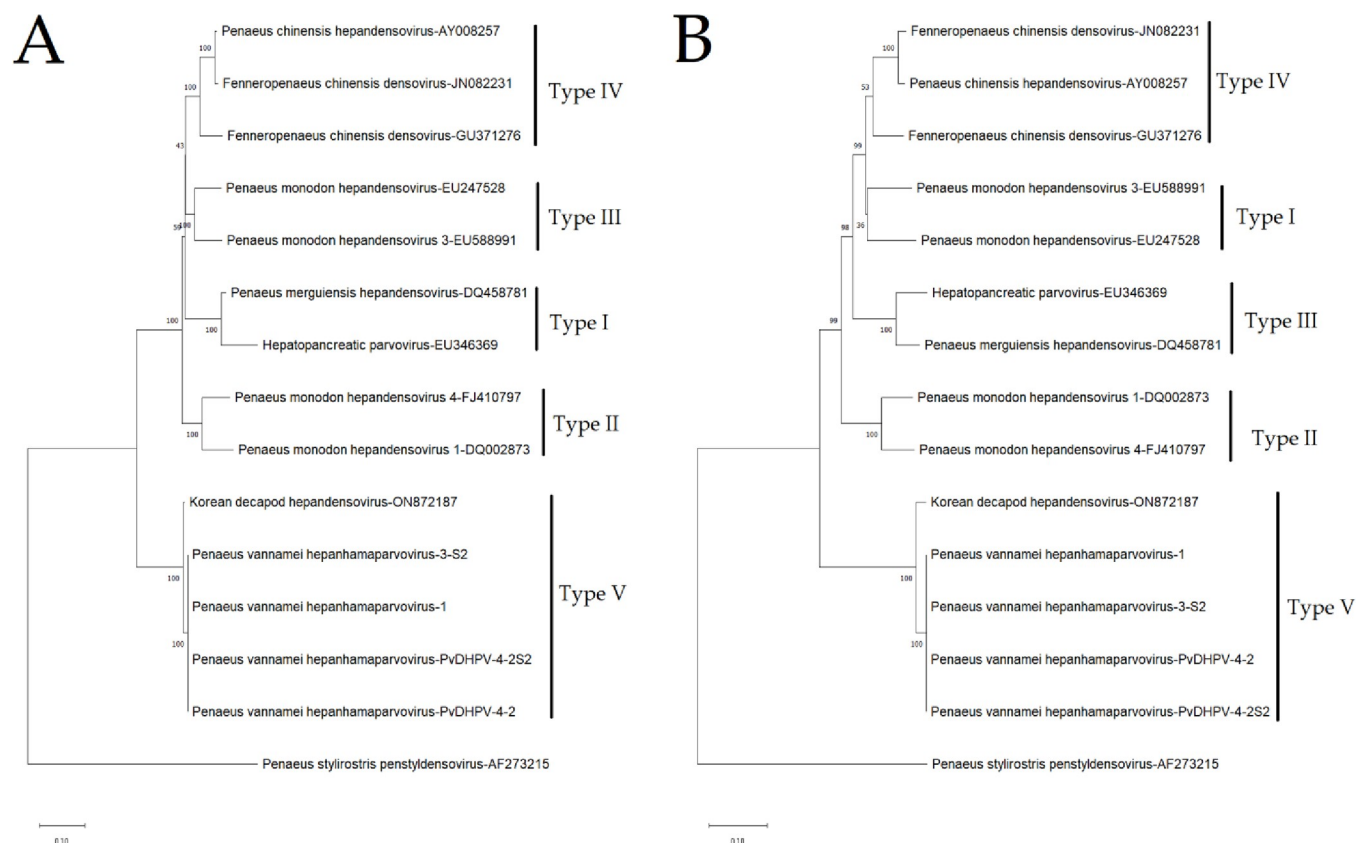

**Fig 5. The evolutionary relationship of the newly identified DHPV isolate from Latin America to previously known genotypes of *Decapod hepanhamaparvovirus* 1 based on nucleotide and amino acid sequences (A) Whole genome phylogeny of reference DHPV genotypes clustering into the well-recognized genotypes I, II, III and IV. The novel DHPV isolate from Latin America forms a well-supported cluster with a new Korean isolate. We have termed this group as genotype V. (B) Capsid protein phylogeny of the same DHPV genotypes. An identical topology was observed utilizing the capsid protein sequence with the formation of five genotypes representing types I, II, III, IV and V.**

<https://doi.org/10.1371/journal.pone.0311592.g005>

that had been subjected to WGA. Previously, the complete genome of white spot syndrome virus had been reconstructed from FFPE blocks without LMD and only a small portion (~1%) of the total reads were associated with the virus [34]. In this study, up to 19% of the total read were associated with the pathogen. This represents a significant augmentation of the total virus associated read which has a direct impact in facilitating and reducing time needed for bioinformatics analysis. This methodology could be especially useful when the infection intensity is very low or limited to a few cells. Furthermore, it could allow us to perform retrospective studies on uncharacterized viruses at a whole genome level from histological samples that were deemed inadequate for molecular studies due to the limited number of viral inclusions and/or alterations.

In recent years, there has been an increase in the prevalence of hepatopancreatic diseases in cultured shrimp populations (Dhar *et al.*, unpublished). Globally in the last three years, *Enterocytozoon hepatopenaei* (EHP), *Penaeus monodon* nudivirus (PmNV), *Penaeus vannamei* Solinivirus (PvSV), Necrotizing hepatopancreatitis bacterium (NHP-B), various *Vibrio* sp. causing acute hepatopancreatic necrosis disease (AHPND) and DHPV have been frequently detected in the tubule epithelial cells of hepatopancreas by histological and/or molecular surveys [6, 35–40]. Among these infectious agents, DHPV has been detected with increasing frequency in our laboratory. Interestingly, we have observed divergence not just at the genomic level but also

some DHPV variants show variation in their tissue tropism. In one diagnostic case from 2021, we detected shrimp that presented with typical DHPV lesions in the hepatopancreas but did not provide positive result with any of the known molecular methods recommended by the WOAHP or the universal PCR method recently reported by [7]. This case presented a unique opportunity for us to explore if LMD could be used to selectively dissect cells displaying pathognomonic lesions of DHPV. Employing a combination of LMD and WGA amplification techniques, we were able to successfully sequence and characterize the complete viral genome of this unique DHPV strain. Furthermore, we developed specific PCR methods tailored to detect this particular genotype of DHPV, which did not respond to previously reported methods. A significant challenge that remains with this pathogen is the development of a universal detection method capable of identifying all DHPV genotypes.

Review of the literature showed DHPV isolates infecting various shrimp species across diverse geographical regions consistently represent significant genetic diversity at both the nucleotide and amino acid levels. [10, 41]. The highest level of sequence similarity was found in the amino acid sequence of the NS1 gene (97.1–99.8%) [41] which is consistent with the present study where similarity ranging from 87–97% was recorded. In contrast, the amino acid VP sequence is known to be the most variable of the DHPV genes with a mean genetic distance of 24% among isolates [10, 39]. Our study was also in accordance with previous studies where amino acids sequence identity ranged from 62–96%. Overall, the DHPV isolate from Latin America showed the highest nucleotide identity (98%) with a recently reported Korean isolate [39].

Phylogenetic relationships between geographically different DHPV genotypes has traditionally been studied employing the amino acid sequences of the VP1 and NS1 genes [10, 39, 41]. Traditionally, phylogenetic clustering indicates the existence of three distinct DHPV genotypes [10, 42]. Type I includes isolates from Korea, Madagascar, and Tanzania; Type II includes isolates from Thailand and Indonesia, while Type III contains isolates from Australia and New Caledonia [10, 42]. More recently, utilizing an increased number of sequences a fourth well-supported genotype (Type IV) was identified that contained Korean and Chinese isolates [3, 41]. However, in a recently published article Kim et al., (2024) reported DHPV isolates from Madagascar, Tanzania, Korea and Chinese Isolates as a single genotype (Genotype I) although these isolates formed two distinct clades (see Fig 3A and 3B in Kim et al., 2024). The study of Kim et al., [39] also proposed the emergence of a new genotype. In this study, we observed a similar topology to what was previously reported by Dhar et al., [3, 41] where four genotypes are identified. Furthermore, in accordance with Kim et al., [39] the Korean isolate forms an additional well supported cluster with the newly reported Latin American isolates. Considering the high sequence divergence at a nucleotide and amino acid level and that these isolates are the only ones, for the moment, reported from *P. vannamei* we propose the formation of a Type V genotype.

In summary, our study is a showcase of an innovating approach for pathogen discovery leveraging LMD coupled with WGA to sequence a viral genome from a restricted number of infected cells isolated from Davidson fixed paraffin embedded histology tissue samples. This innovative strategy substantially augments the yield of virus-associated sequences, streamlining subsequent bioinformatics analyses and significantly curtailing the time required for comprehensive characterization. Furthermore, the identification of a novel DHPV isolate originating from Latin America unveils a distinctive genetic profile, diverging markedly from previously documented DHPV genotypes. Our findings propose the classification of this isolate into a newly proposed genotype, denoted as 'Type V'. This novel approach not only holds promise for expediting pathogen discovery but also enables retrospective investigations into previously unexplored viruses at a whole-genome level, utilizing histological archives. The

Aquaculture Pathology Laboratory, a Reference Laboratory of Crustacean Diseases of the World Organization for Animal health (Paris, France), has an archives of over 110,000 histological blocks dating back to mid-70's originating from many countries around the world. These histological tissue archives are valuable biological materials to study viral evolution, epidemiology, and pathogenesis, thus underscoring the transformative potential of the finding presented in this paper.

## Supporting information

**S1 Fig.** Alignment of primer regions, comparing the WOA reference primers (Panels A and B) with the two novel primer pairs designed for this study (Panels C and D). (ODT)

**S1 File.**  
(ZIP)

## Acknowledgments

The authors would like to thank Maia Adrasteia Koliopoulos, Dr. Hung Nam Mai, and Sara Lynn for their assistance in histological processing, LMD and *in situ* hybridization, respectively.

## Author Contributions

**Conceptualization:** Roberto Cruz-Flores, Arun K. Dhar.

**Data curation:** Roberto Cruz-Flores.

**Formal analysis:** Roberto Cruz-Flores.

**Funding acquisition:** Arun K. Dhar.

**Methodology:** Roberto Cruz-Flores, Arun K. Dhar.

**Project administration:** Arun K. Dhar.

**Supervision:** Arun K. Dhar.

**Visualization:** Roberto Cruz-Flores.

**Writing – original draft:** Roberto Cruz-Flores.

**Writing – review & editing:** Arun K. Dhar.

## References

1. Duffy S. Why are RNA virus mutation rates so damn high? PLoS Biol. 2018; 16: 1–6. <https://doi.org/10.1371/journal.pbio.3000003> PMID: 30102691
2. Robles-Sikisaka R, Bohonak AJ, McClenaghan LR, Dhar AK. Genetic Signature of Rapid IHNV (Infectious Hypodermal and Hematopoietic Necrosis Virus) Expansion in Wild Penaeus Shrimp Populations. Adler FR, editor. PLoS One. 2010; 5: e11799. <https://doi.org/10.1371/journal.pone.0011799> PMID: 20668694
3. Dhar AK, Cruz-Flores R, Caro LFA, Siewiora HM, Jory D. Diversity of single-stranded DNA containing viruses in shrimp. VirusDisease. Springer India; 2019; 30: 43–57. <https://doi.org/10.1007/s13337-019-00528-3> PMID: 31143831
4. Péntzes JJ, Söderlund-Venermo M, Canuti M, Eis-Hübinger AM, Hughes J, Cotmore SF, et al. Reorganizing the family Parvoviridae: a revised taxonomy independent of the canonical approach based on host association. Arch Virol. Springer Vienna; 2020; 165: 2133–2146. <https://doi.org/10.1007/s00705-020-04632-4> PMID: 32533329

5. Walsh R, La Fauce K, Crockford M, Jones B, Owens L. Genomic heterogeneity and prevalence of hepadensovirus in *Penaeus esculentus* from Western Australia, and *P. merguensis* from the Gulf of Carpentaria, Australia. *Aquaculture*. Elsevier B.V.; 2017; 471: 43–48. <https://doi.org/10.1016/j.aquaculture.2017.01.006>
6. Lee C, Jeon HJ, Kim B, Choi SK, Kim JH, Han JE. Multiple infections of a new-type decapod hepanhamaparvovirus (DHPV) and *Enterocytozoon hepatopenaei* in Korea and DHPV infectivity in *Penaeus vannamei*. *Aquaculture*. Elsevier B.V.; 2023; 563: 738922. <https://doi.org/10.1016/j.aquaculture.2022.738922>
7. Srisala J, Thaiue D, Sanguanrut P, Aldama-Cano DJ, Flegel TW, Sritunyalucksana K. Potential universal PCR method to detect decapod hepanhamaparvovirus (DHPV) in crustaceans. *Aquaculture*. Elsevier B.V.; 2021; 541: 736782. <https://doi.org/10.1016/j.aquaculture.2021.736782>
8. Lightner DV, Redman RM. A parvo-like virus disease of penaeid shrimp. *J Invertebr Pathol*. 1985; 45: 47–53. [https://doi.org/10.1016/0022-2011\(85\)90048-5](https://doi.org/10.1016/0022-2011(85)90048-5)
9. Lightner DD V. A handbook of shrimp pathology and diagnostic procedures for diseases of cultured penaeid shrimp. First Edit.: Baton Rouge, Louisiana, USA: World Aquaculture Society; 1996.
10. Tang K, Pantoja C, Lightner D. Nucleotide sequence of a Madagascar hepatopancreatic parvovirus (HPV) and comparison of genetic variation among geographic isolates. *Dis Aquat Organ*. 2008; 80: 105–112. <https://doi.org/10.3354/dao01928> PMID: 18717063
11. Cruz-Flores R, Cáceres-Martínez J, Vásquez-Yeomans R. A novel method for separation of Rickettsiales-like organism “*Candidatus Xenohalictis californiensis*” from host abalone tissue. *J Microbiol Methods*. Elsevier B.V.; 2015; 115: 79–82. <https://doi.org/10.1016/j.mimet.2015.05.021> PMID: 26025805
12. Kearse M, Moir R, Wilson A, Stones-Havas S, Cheung M, Sturrock S, et al. Geneious Basic: An integrated and extendable desktop software platform for the organization and analysis of sequence data. *Bioinformatics*. 2012; 28: 1647–1649. <https://doi.org/10.1093/bioinformatics/bts199> PMID: 22543367
13. Altschul SF, Gish W, Miller W, Myers EW, Lipman DJ. Basic local alignment search tool. *J Mol Biol*. 1990; 215: 403–410. [https://doi.org/10.1016/S0022-2836\(05\)80360-2](https://doi.org/10.1016/S0022-2836(05)80360-2) PMID: 2231712
14. Antonio DB, Andree KB, McDowell TS, Hedrick RP. Detection of myxobolus cerebralis in rainbow trout and oligochaete tissues by using a nonradioactive in situ hybridization (Ish) protocol. *J Aquat Anim Health*. 1998; 10: 338–347. [https://doi.org/10.1577/1548-8667\(1998\)010<0338:DOMCIR>2.0.CO;2](https://doi.org/10.1577/1548-8667(1998)010<0338:DOMCIR>2.0.CO;2)
15. Cruz-Flores R, Cáceres-Martínez J, Muñoz-Flores M, Vásquez-Yeomans R, Hernández Rodríguez M, Ángel Del Río-Portilla M, et al. Hyperparasitism by the bacteriophage (Caudovirales) infecting *Candidatus Xenohalictis californiensis* (Rickettsiales-like prokaryote) parasite of wild abalone *Haliotis fulgens* and *Haliotis corrugata* from the Peninsula of Baja California, Mexico. *J Invertebr Pathol*. Elsevier Inc.; 2016; 140: 58–67. <https://doi.org/10.1016/j.jip.2016.09.001> PMID: 27623402
16. Tang K, Poulos B, Wang J, Redman R, Shih H, Lightner D. Geographic variations among infectious hypodermal and hematopoietic necrosis virus (IHHNV) isolates and characteristics of their infection. *Dis Aquat Organ*. 2003; 53: 91–99. <https://doi.org/10.3354/dao053091> PMID: 12650241
17. Edgar RC. MUSCLE: Multiple sequence alignment with high accuracy and high throughput. *Nucleic Acids Res*. 2004; 32: 1792–1797. <https://doi.org/10.1093/nar/gkh340> PMID: 15034147
18. Saitou N, Nei M. The neighbor-joining method: a new method for reconstructing phylogenetic trees. *Mol Biol Evol*. 1987; 4: 406–425. <https://doi.org/10.1093/oxfordjournals.molbev.a040454> PMID: 3447015
19. Kimura M. A simple method for estimating evolutionary rates of base substitutions through comparative studies of nucleotide sequences. *J Mol Evol*. 1980; 16: 111–120. <https://doi.org/10.1007/BF01731581> PMID: 7463489
20. Felsenstein J. CONFIDENCE LIMITS ON PHYLOGENIES: AN APPROACH USING THE BOOTSTRAP. *Evolution (N Y)*. 1985; 39: 783–791. <https://doi.org/10.1111/j.1558-5646.1985.tb00420.x> PMID: 28561359
21. Kumar S, Stecher G, Tamura K. MEGA7: Molecular Evolutionary Genetics Analysis Version 7. 0 for Bigger Datasets. *Mol B*. 2018; 33: 1870–1874. <https://doi.org/10.1093/molbev/msw054> PMID: 27004904
22. Curran S, McKay JA, McLeod HL, Murray GI. Laser capture microscopy. *J Clin Pathol—Mol Pathol*. 2000; 53: 64–68. <https://doi.org/10.1136/mp.53.2.64> PMID: 10889904
23. Murray GI. An overview of laser microdissection technologies. *Acta Histochem*. 2007; 109: 171–176. <https://doi.org/10.1016/j.acthis.2007.02.001> PMID: 17462720
24. Vannucci FA, Foster DN, Gebhart CJ. Laser microdissection coupled with RNA-seq analysis of porcine enterocytes infected with an obligate intracellular pathogen (*Lawsonia intracellularis*). *BMC Genomics*. 2013; 14: 1. <https://doi.org/10.1186/1471-2164-14-421> PMID: 23800029



25. Resnick MB, Sabo E, Meitner PA, Kim SS, Cho Y, Kim HK, et al. Global analysis of the human gastric epithelial transcriptome altered by *Helicobacter pylori* eradication in vivo. *Gut*. 2006; 55: 1717–1724. <https://doi.org/10.1136/gut.2006.095646> PMID: 16641130
26. Brogaard L, Klitgaard K, Heegaard PMH, Hansen MS, Jensen TK, Skovgaard K. Concurrent host-pathogen gene expression in the lungs of pigs challenged with *Actinobacillus pleuropneumoniae*. *BMC Genomics*. ???; 2015; 16: 1–15. <https://doi.org/10.1186/s12864-015-1557-6> PMID: 26018580
27. Reigstad CS, Hultgren SJ, Gordon JI. Functional genomic studies of uropathogenic *Escherichia coli* and host urothelial cells when intracellular bacterial communities are assembled. *J Biol Chem*. © 2007 ASBMB. Currently published by Elsevier Inc; originally published by American Society for Biochemistry and Molecular Biology.; 2007; 282: 21259–21267. <https://doi.org/10.1074/jbc.M611502200> PMID: 17504765
28. Podgorny O V., Lazarev VN. Laser microdissection: A promising tool for exploring microorganisms and their interactions with hosts. *J Microbiol Methods*. Elsevier B.V.; 2017; 138: 82–92. <https://doi.org/10.1016/j.mimet.2016.01.001> PMID: 26775287
29. Chassaing B, Gewirtz AT. Identification of Inner Mucus-Associated Bacteria by Laser Capture Microdissection. *Cmgh*. 2019; 7: 157–160. <https://doi.org/10.1016/j.jcmgh.2018.09.009> PMID: 30510996
30. Riva A, Kuzyk O, Forsberg E, Siuzdak G, Pfann C, Herbold C, et al. A fiber-deprived diet disturbs the fine-scale spatial architecture of the murine colon microbiome. *Nat Commun*. Springer US; 2019; 10: 1–11. <https://doi.org/10.1038/s41467-019-12413-0> PMID: 31554820
31. Cruz-Flores R, López-Carvallo JA, Cáceres-Martínez J, Dhar AK. Microbiome analysis from formalin-fixed paraffin-embedded tissues: Current challenges and future perspectives. *J Microbiol Methods*. 2022; 196: 106476. <https://doi.org/10.1016/j.mimet.2022.106476> PMID: 35490989
32. Lasken RS. Genomic sequencing of uncultured microorganisms from single cells. *Nat Rev Microbiol*. 2012; 10: 631–640. <https://doi.org/10.1038/nrmicro2857> PMID: 22890147
33. McLean JS, Lasken RS. Single cell genomics of bacterial pathogens: Outlook for infectious disease research. *Genome Med*. 2014; 6: 108–110. <https://doi.org/10.1186/s13073-014-0108-0> PMID: 25621014
34. Cruz-Flores R, Mai HN, Kanrar S, Aranguren Caro LF, Dhar AK. Genome reconstruction of white spot syndrome virus (WSSV) from archival Davidson's-fixed paraffin embedded shrimp (*Penaeus vannamei*) tissue. *Sci Rep*. Nature Publishing Group UK; 2020; 10: 13425. <https://doi.org/10.1038/s41598-020-70435-x> PMID: 32778727
35. Wan Sajiri WMH, Borkhanuddin MH, Kua BC. Occurrence of *Enterocytozoon hepatopenaei* (EHP) infection on *Penaeus vannamei* in one rearing cycle. *Dis Aquat Organ*. 2021; 144: 1–7. <https://doi.org/10.3354/dao03571> PMID: 33704087
36. Wan Sajiri WMH, Kua BC, Borkhanuddin MH. Detection of *Enterocytozoon hepatopenaei* (EHP) (microsporidia) in several species of potential macrofauna-carriers from shrimp (*Penaeus vannamei*) ponds in Malaysia. *J Invertebr Pathol*. Elsevier Inc.; 2023; 198. <https://doi.org/10.1016/j.jip.2023.107910> PMID: 36889458
37. Intriago P, Espinoza J, Brock J, Farms A. Passive surveillance for shrimp pathogens in *Penaeus vannamei* submitted from 3 Regions of Latin America. 2023; <https://doi.org/10.1101/2023.08.29.555391>
38. Cruz-Flores R, Andrade TPD, Mai HN, Alenton RRR, Dhar AK. Identification of a Novel Solinvivirus with Nuclear Localization Associated with Mass Mortalities in Cultured Whiteleg Shrimp (*Penaeus vannamei*). *Viruses*. 2022; 14: 2220. <https://doi.org/10.3390/v14102220> PMID: 36298775
39. Kim B, Lee C, Jeon HJ, Lee JM, Piamsomboon P, Kim JH, et al. Full genome analysis of a novel genotype of Decapod hepadensovirus 1 (DHPV) infecting Pacific whiteleg shrimp, *Penaeus vannamei*. *Aquaculture*. Elsevier B.V.; 2024; 579: 740247. <https://doi.org/10.1016/j.aquaculture.2023.740247>
40. Soto-Rodríguez SA, Gomez-Gil B, Lozano-Olvera R, Aguilar-Rendón KG, González-Gómez JP. Identification of new *Vibrio campbellii* strains harboring the pVA1 plasmid isolated from *Penaeus vannamei* postlarvae affected by outbreaks of acute hepatopancreatic necrosis disease (AHPND) in Mexico. *Aquaculture*. 2024; 579. <https://doi.org/10.1016/j.aquaculture.2023.740221>
41. Dhar AK, Robles-Sikisaka R, Saksmerprome V, Lakshman DK. *Biology, Genome Organization, and Evolution of Parvoviruses in Marine Shrimp*. *Advances in Virus Research*. 1st ed. Elsevier Inc.; 2014. pp. 85–139. <https://doi.org/10.1016/B978-0-12-800172-1.00003-3>
42. Jeeva S, Seo HC, Lee Y-S, Jang IK, Seo HC, Choi T-J. Complete nucleotide sequence analysis of a Korean strain of hepatopancreatic parvovirus (HPV) from *Fenneropenaeus chinensis*. *Virus Genes*. 2011; 44: 89–97. <https://doi.org/10.1007/s11262-011-0675-8> PMID: 21948006
